# Supplementary material for: Dimethylcysteine (DiCys)/o-Phthalaldehyde Derivatization for Chiral Metabolite Analyses: Cross-Comparison of Six Chiral Thiols
Source: MDPI journal article supplement (doi:10.3390/molecules26247416), 2021-12-07
Supplement: s1 [file s1]

# **Supplementary Information**

for

## **Dimethylcysteine (DiCys)/o-phthalaldehyde derivatization for chiral metabolite analyses: cross-comparison of six chiral thiols**

Ankhubayar Lkhagva <sup>1</sup>, Hwan-Ching Tai <sup>2\*</sup>

<sup>1</sup> Department of Chemistry, National University of Mongolia, Ulaanbaatar, Mongolia

<sup>2</sup> School of Public Health, Xiamen University, Xiamen, Fujian, China

\* Corresponding Author

**Table S1.** Enantiomeric analysis of amino acids using different chiral thiols

(a)

| Amino acid | OPA/DiCys         |               |
|------------|-------------------|---------------|
|            | Resolution factor | Elution order |
| Ala        | 1.7               | D, L          |
| Glu        | 1.2               | D, L          |
| Phe        | 2.3               | D, L          |
| Ser        | 2.8               | D, L          |
| Tyr        | 1.7               | D, L          |

(b)

| Amino acid | OPA/NAC           |               |
|------------|-------------------|---------------|
|            | Resolution factor | Elution order |
| Ala        | 1.1               | D, L          |
| Glu        | 0.6               | D, L          |
| Phe        | 0.3               | D, L          |
| Ser        | 1.6               | D, L          |
| Tyr        | 2.3               | L, D          |

(c)

| Amino acid | OPA/NAP           |               |
|------------|-------------------|---------------|
|            | Resolution factor | Elution order |
| Ala        | 0.9               | L, D          |
| Glu        | 0.5               | D, L          |
| Phe        | #                 |               |
| Ser        | 1.4               | D, L          |
| Tyr        | 2.0               | L, D          |

(d)

| Amino acid | OPA/IBLC          |               |
|------------|-------------------|---------------|
|            | Resolution factor | Elution order |
| Ala        | 2.9               | L, D          |
| Glu        | 1.6               | L, D          |
| Phe        | 2.2               | L, D          |
| Ser        | 2.7               | L, D          |
| Tyr        | 1.8               | L, D          |

(e)

| Amino acid | OPA/NBC           |               |
|------------|-------------------|---------------|
|            | Resolution factor | Elution order |
| Ala        | #                 |               |
| Glu        | 1.6               | L, D          |
| Phe        | 0.7               | L, D          |
| Ser        | 1.4               | L, D          |
| Tyr        | 0.5               | L, D          |

(f)

| Amino acid | OPA/ BTCC         |               |
|------------|-------------------|---------------|
|            | Resolution factor | Elution order |
| Ala        | #                 |               |
| Glu        | #                 |               |
| Phe        | 0.3               | L, D          |
| Ser        | #                 |               |
| Tyr        | 0.9               | D, L          |

Note: Resolution factor ( $R_s$ ) =  $1.18 (t_2 - t_1)/(w_2 + w_1)$ , where  $t$  is elution time,  $w$  is the peak width at half maximum height. # indicates failure to resolve the enantiomer pair.

**Table S2.** MS/MS analysis of chiral amino acids identification in rice water by IBLC/OPA

| Amino acid | Retention time<br>(min) | Precursor ion<br>[M+H]<br>( <i>m/z</i> ) | Manually<br>integrated peak<br>area (MA) | Product ion<br>[M+H-IBLC]<br>( <i>m/z</i> ) |
|------------|-------------------------|------------------------------------------|------------------------------------------|---------------------------------------------|
| L-Ala      | 32.96                   | 379.31                                   | 2.62x10 <sup>7</sup>                     | 189.07                                      |
| D-Ala      | 34.41                   | 379.32                                   | 2.31x10 <sup>6</sup>                     | 189.07                                      |
| L-Arg      | 37.14                   | 464.73                                   | 8.98x10 <sup>6</sup>                     | 274.13                                      |
| D-Arg      | 38.51                   | 464.74                                   | 1.56x10 <sup>6</sup>                     | 274.15                                      |
| L-Asn      | 21.71                   | 422.23                                   | 5.06x10 <sup>6</sup>                     | 232.09                                      |
| L-Asp      | 6.95                    | 423.35                                   | 1.94x10 <sup>7</sup>                     | 233.10                                      |
| L-Cys      | 35.26                   | 411.23                                   | 3.01x10 <sup>5</sup>                     | 211.03                                      |
| L-Glu      | 8.79                    | 437.56                                   | 2.69x10 <sup>7</sup>                     | 247.08                                      |
| L-Gln      | 27.62                   | 436.34                                   | 2.31x10 <sup>6</sup>                     | 246.10                                      |
| Gly        | 31.12                   | 365.01                                   | 9.67x10 <sup>6</sup>                     | 175.06                                      |
| L-His      | 29.47                   | 445.09                                   | 1.95x10 <sup>6</sup>                     | 255.16                                      |
| L-Ile      | 43.36                   | 421.14                                   | 9.29x10 <sup>6</sup>                     | 231.08                                      |
| L-Leu      | 44.87                   | 421.43                                   | 4.32x10 <sup>6</sup>                     | 231.08                                      |
| L-Lys      | 42.05                   | 436.41                                   | 1.08x10 <sup>6</sup>                     | 246.10                                      |
| D-Lys      | 43.93                   | 436.40                                   | 3.31x10 <sup>5</sup>                     | 246.10                                      |
| L-Met      | 41.24                   | 439.04                                   | 2.99x10 <sup>6</sup>                     | 249.05                                      |
| L-Phe      | 41.99                   | 455.39                                   | 4.91x10 <sup>6</sup>                     | 265.08                                      |
| D-Phe      | 43.12                   | 455.38                                   | 4.66x10 <sup>5</sup>                     | 265.08                                      |
| L-Pro      | 46.70                   | 405.08                                   | 4.26x10 <sup>6</sup>                     | 215.09                                      |
| L-Ser      | 23.52                   | 395.31                                   | 4.55x10 <sup>6</sup>                     | 205.07                                      |
| D-Ser      | 24.92                   | 395.33                                   | 4.75x10 <sup>5</sup>                     | 205.07                                      |
| L-Thr      | 30.17                   | 409.13                                   | 1.44x10 <sup>7</sup>                     | 219.08                                      |
| L-Trp      | 42.04                   | 494.28                                   | 2.95x10 <sup>6</sup>                     | 304.05                                      |
| L-Tyr      | 36.39                   | 471.45                                   | 3.42x10 <sup>6</sup>                     | 281.10                                      |
| D-Tyr      | 37.63                   | 471.41                                   | 4.20x10 <sup>5</sup>                     | 281.10                                      |
| L-Val      | 40.85                   | 407.04                                   | 7.68x10 <sup>6</sup>                     | 217.09                                      |
| D-Val      | 41.61                   | 407.03                                   | 2.46x10 <sup>5</sup>                     | 217.08                                      |

**Table S3.** MS/MS analysis of chiral amino acids identification in rice water by DiCys/OPA

| Amino acid | Retention time<br>(min) | Precursor ion<br>[M+H] ( <i>m/z</i> ) | Manually<br>integrated peak<br>area (MA) | Product ion<br>[M+H-DiCys]<br>( <i>m/z</i> ) |
|------------|-------------------------|---------------------------------------|------------------------------------------|----------------------------------------------|
| L-Ala      | 32.51                   | 337.41                                | 1.75x10 <sup>7</sup>                     | 189.07                                       |
| D-Ala      | 29.50                   | 337.42                                | 1.54x10 <sup>6</sup>                     | 189.07                                       |
| L-Arg      | 34.27                   | 422.02                                | 5.99x10 <sup>6</sup>                     | 274.13                                       |
| D-Arg      | 33.67                   | 422.03                                | 1.04x10 <sup>6</sup>                     | 274.13                                       |
| L-Asn      | 16.05                   | 380.21                                | 3.37x10 <sup>6</sup>                     | 232.09                                       |
| L-Asp      | 6.54                    | 381.12                                | 1.29x10 <sup>7</sup>                     | 233.10                                       |
| L-Cys      | 33.09                   | 369.23                                | 9.50x10 <sup>5</sup>                     | 221.28                                       |
| L-Glu      | 7.68                    | 395.45                                | 1.79x10 <sup>7</sup>                     | 247.08                                       |
| L-Gln      | 55.81                   | 394.32                                | 1.54x10 <sup>6</sup>                     | 246.10                                       |
| Gly        | 22.51                   | 323.08                                | 6.44x10 <sup>6</sup>                     | 175.06                                       |
| L-His      | 24.88                   | 403.43                                | 1.30x10 <sup>6</sup>                     | 255.16                                       |
| L-Ile      | 40.88                   | 379.21                                | 6.19x10 <sup>6</sup>                     | 231.08                                       |
| L-Leu      | 41.07                   | 379.26                                | 2.88x10 <sup>6</sup>                     | 231.08                                       |
| L-Lys      | 45.81                   | 394.09                                | 7.21x10 <sup>5</sup>                     | 246.10                                       |
| D-Lys      | 44.17                   | 394.08                                | 2.21x10 <sup>5</sup>                     | 246.10                                       |
| L-Met      | 35.68                   | 397.32                                | 1.99x10 <sup>6</sup>                     | 249.05                                       |
| L-Phe      | 43.22                   | 413.12                                | 3.27x10 <sup>6</sup>                     | 265.08                                       |
| D-Phe      | 42.14                   | 413.13                                | 3.11x10 <sup>5</sup>                     | 265.08                                       |
| L-Pro      | 24.39                   | 363.33                                | 2.84x10 <sup>6</sup>                     | 215.09                                       |
| L-Ser      | 17.43                   | 353.06                                | 3.03x10 <sup>6</sup>                     | 205.07                                       |
| D-Ser      | 16.31                   | 353.07                                | 3.17x10 <sup>5</sup>                     | 205.07                                       |
| L-Thr      | 29.22                   | 367.13                                | 9.60x10 <sup>6</sup>                     | 219.08                                       |
| L-Trp      | 38.82                   | 452.24                                | 1.96x10 <sup>6</sup>                     | 304.05                                       |
| L-Tyr      | 37.13                   | 429.21                                | 2.28x10 <sup>6</sup>                     | 281.10                                       |
| D-Tyr      | 35.93                   | 429.23                                | 2.80x10 <sup>5</sup>                     | 281.10                                       |
| L-Val      | 36.52                   | 365.43                                | 5.12x10 <sup>6</sup>                     | 217.09                                       |
| D-Val      | 35.29                   | 365.42                                | 1.64x10 <sup>5</sup>                     | 217.08                                       |

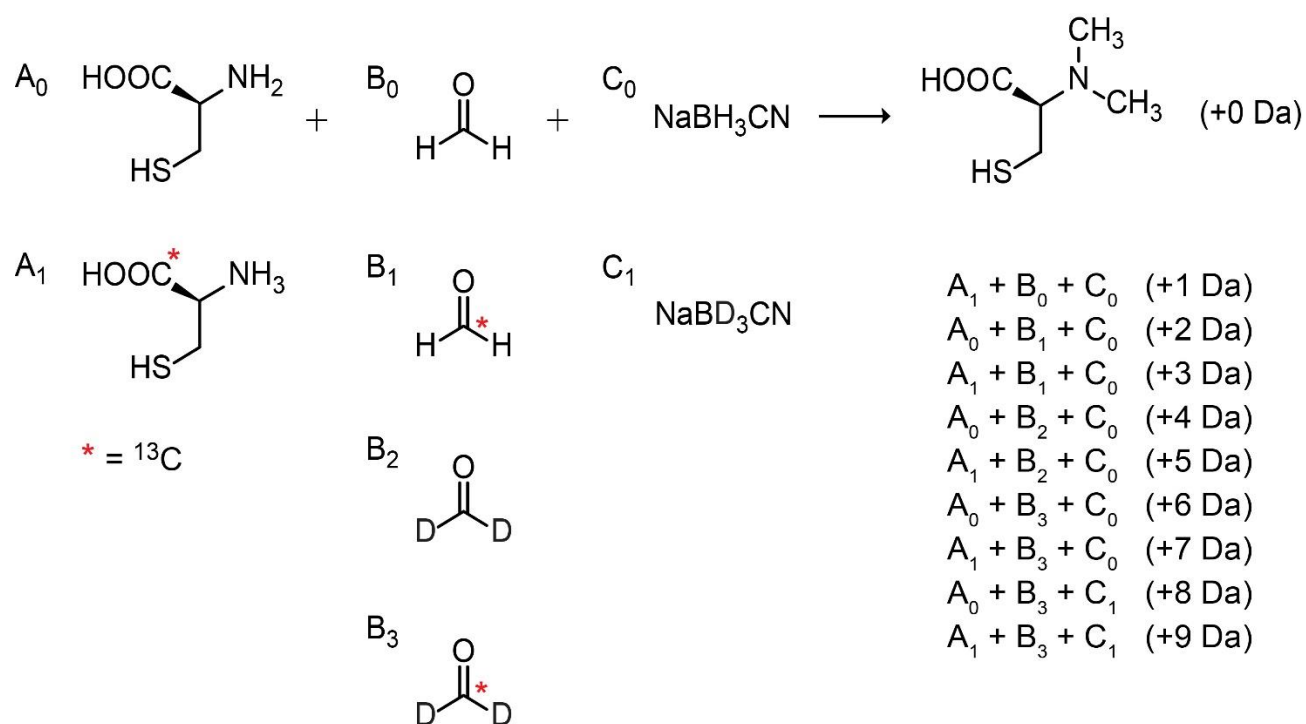

**Figure S1.** Proposed synthesis scheme for isotope-tagged DiCys.

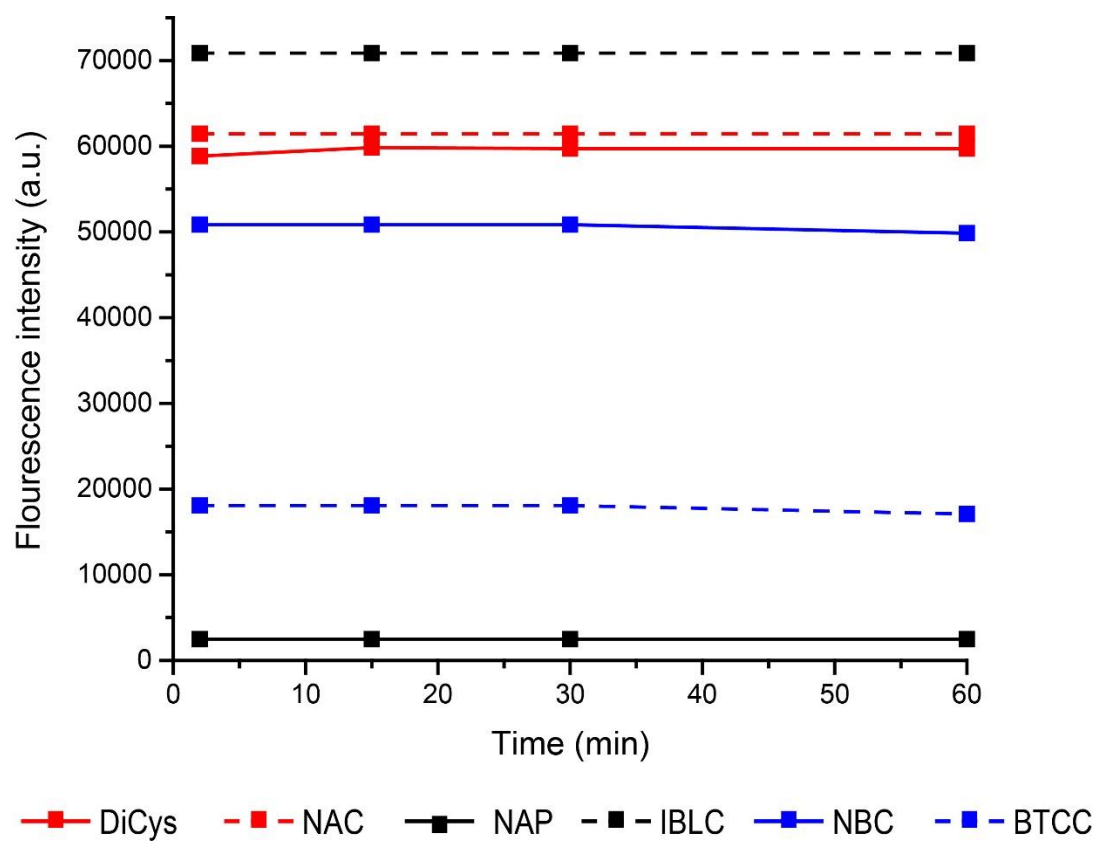

**Figure S2.** The stability of OPA-derivatized alanine with different thiols at 4 °C.

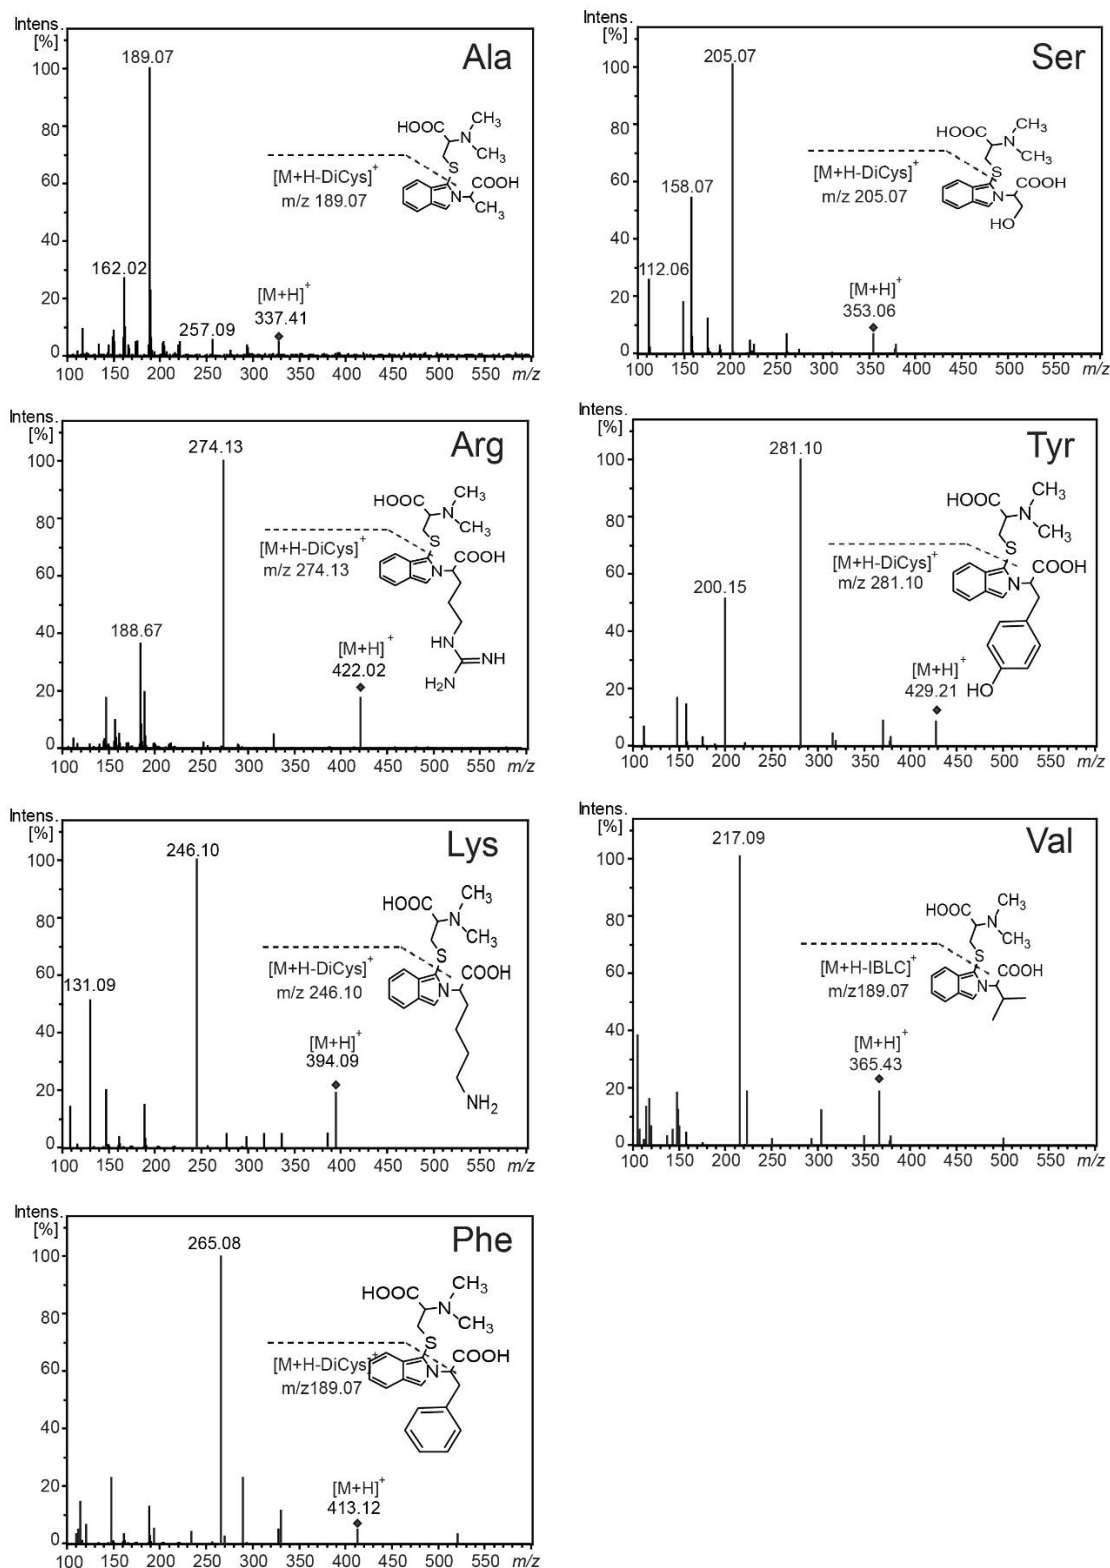

**Figure S3.** Fragmentation patterns of DiCys/OPA adducts with seven D-amino acids



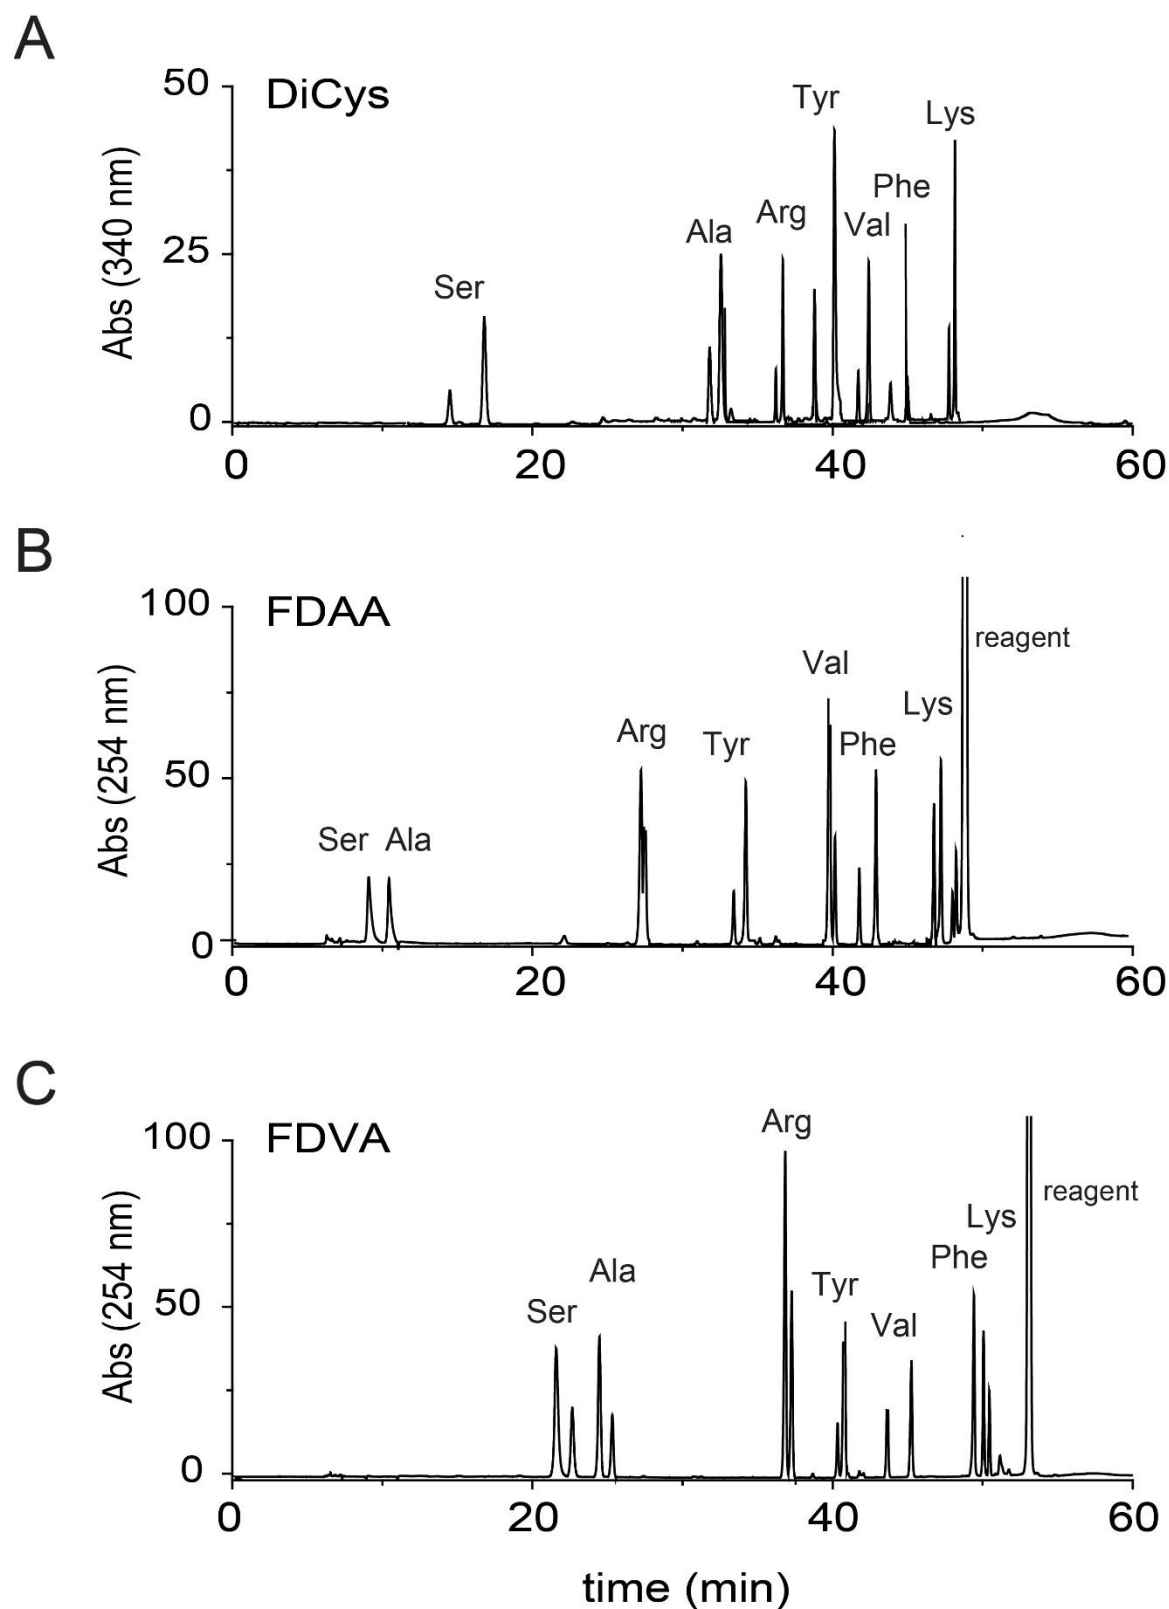

**Figure S4.** RP-HPLC analysis of amino acid enantiomers derivatized with OPA/DiCys (A) and Marfey's reagents—FDAA (B), and FDVA (C). The ratio between L: D amino acids is 3:1.
